# Supplementary material for: Probiotic OMNi-BiOTiC® 10 AAD Reduces Cyclophosphamide-Induced Inflammation and Adipose Tissue Wasting in Mice
Source: MDPI journal article supplement (doi:10.3390/nu15163655), 2023-08-20
Supplement: s1 [file s1]

## Supplementary Data

**Table S1:** Primer information. For the primer design genes were identified from the National Center for Biotechnology Information database ([www.ncbi.nlm.nih.gov/gene/](http://www.ncbi.nlm.nih.gov/gene/)). All primers were designed with the Primer designing tool Primer-BLAST ([www.ncbi.nlm.nih.gov/tools/primer-blast/index.cgi?LINMK\\_LOC=BlastHome](http://www.ncbi.nlm.nih.gov/tools/primer-blast/index.cgi?LINMK_LOC=BlastHome)) using the preset standard settings. Ms...mouse; Seq...Sequence; RefSeq...Accession number; FW...forward; RV...reverse.

|                     |                            |                           |
|---------------------|----------------------------|---------------------------|
| <b>msACTB</b>       | <b>Gene ID: 11461</b>      |                           |
| <b>Seq</b>          | FW: TCAGCAAGCAGGAGTACGATG  | RV: AACGCAGCTCAGTAACAGTCC |
| <b>RefSeq</b>       | NM_007393.5                |                           |
| <b>msNFKB</b>       | <b>Gene ID: 18033</b>      |                           |
| <b>Seq</b>          | FW: GTGGAGGCATGTTCCGGTAGT  | RV: CACCGTAGGGAGGAAATCCG  |
| <b>RefSeq</b>       | NM_008689.2                |                           |
| <b>msHMBS</b>       | <b>Gene ID: 15288</b>      |                           |
| <b>Seq</b>          | FW: GCGGAGTCATGTCCGGTAA    | RV: ATCACCTCATCTTTGAGCCG  |
| <b>RefSeq</b>       | NM_013551.2                |                           |
| <b>msTJP1</b>       | <b>Gene ID: 21872</b>      |                           |
| <b>Seq</b>          | FW: GAGCCCTCCGATCATTCCAC   | RV: CCCCAGGTTTAGACATTGCT  |
| <b>RefSeq</b>       | NM_009386.2                |                           |
| <b>msOCCLUDIN-1</b> | <b>Gene ID: 18260</b>      |                           |
| <b>Seq</b>          | FW: CTTATCTTGGGAGCCTGGACAT | RV: CTTTCAAAGGCCTCACGGAC  |
| <b>RefSeq</b>       | NM_008756.2                |                           |
| <b>msCLAUDIN 4</b>  | <b>Gene ID: 12740</b>      |                           |
| <b>Seq</b>          | FW: CCATGGAACCCTTCCGTTGA   | RV: ACCCGTCCATCCACTCTACA  |
| <b>RefSeq</b>       | NM_009903.2                |                           |
| <b>msCLAUDIN 2</b>  | <b>Gene ID: 12738</b>      |                           |
| <b>Seq</b>          | FW: ACGTCCAGTGCAATGTCCTC   | RV: GCCACTCTGTCCTTAGCTCG  |
| <b>RefSeq</b>       | NM_016675.4                |                           |
| <b>msMLCK</b>       | <b>Gene ID: 107589</b>     |                           |
| <b>Seq</b>          | FW: ACAGCCAAGTTCTGAAGGGAG  | RV: GGTGATGGCTTGCCCTTTTC  |
| <b>RefSeq</b>       | NM_139300.3                |                           |
| <b>msMUCIN2</b>     | <b>Gene ID: 17831</b>      |                           |
| <b>Seq</b>          | FW: GACCTGACAATGTGCCCAGA   | RV: ACAATGCCACTTCCACCCTC  |
| <b>RefSeq</b>       | NM_023566.4                |                           |
| <b>msMUCIN3</b>     | <b>Gene ID: 666339</b>     |                           |
| <b>Seq</b>          | FW: ACTGGTGGAGAGCGTAGAGA   | RV: CGGTCCTGTAGCTTCTCACTG |
| <b>RefSeq</b>       | NM_010843.2                |                           |
| <b>msBAX</b>        | <b>Gene ID: 12028</b>      |                           |
| <b>Seq</b>          | FW: CGTGGTTGCCCTCTTCTACTT  | RV: ATGGTTCTGATCAGCTCGGG  |
| <b>RefSeq</b>       | NM_007527.3                |                           |
| <b>msBAD</b>        | <b>Gene ID: 12015</b>      |                           |
| <b>Seq</b>          | FW: AGCAACATTCATCAGCAGGGA  | RV: TACGAAGTGTGGCGACTCC   |
| <b>RefSeq</b>       | NM_007522.3                |                           |
| <b>msCASPASE3</b>   | <b>Gene ID: 12367</b>      |                           |

|                   |                            |                                 |
|-------------------|----------------------------|---------------------------------|
| <b>Seq</b>        | FW: CAGTGTCTCTGCGGCGG      | RV:<br>ATCCACTGAGGTTTTGTTGTTCTC |
| <b>RefSeq</b>     | NM_009810.3                |                                 |
| <b>msLAMIN B1</b> | <b>Gene ID: 16906</b>      |                                 |
| <b>Seq</b>        | FW: TGAGGCTGTACAAGGAAGAGC  | RV:<br>ATCTCTGAGGAGAGTCTGGCA    |
| <b>RefSeq</b>     | NM_010721.2                |                                 |
| <b>msBAK 1</b>    | <b>Gene ID: 12018</b>      |                                 |
| <b>Seq</b>        | FW: CCTTCGGGGTCTTCGTCTTT   | RV: GGAGACCACCGTCACTTGTC        |
| <b>RefSeq:</b>    | NM_007523.3                |                                 |
| <b>msBCL2</b>     | <b>Gene ID: 12043</b>      |                                 |
| <b>Seq</b>        | FW: GACTGAGTACCTGAACCGGC   | RV: GCATGCTGGGGCCATATAGT        |
| <b>RefSeq</b>     | NM_009741.5                |                                 |
| <b>msATGL</b>     | <b>Gene ID: 66853</b>      |                                 |
| <b>Seq</b>        | FW: GCCAACGCCACTCACATCTA   | RV:<br>TAATGTTGGCACCTGCTTCAC    |
| <b>RefSeq</b>     | NM_025802.3                |                                 |
| <b>msHSL</b>      | <b>Gene ID:</b>            |                                 |
| <b>Seq</b>        | FW: AGAAGGATCGAAGAACCGCA   | RV: CGACTGTGTCATCGTGCGTA        |
| <b>RefSeq</b>     | NM_010719.5                |                                 |
| <b>msPLIN1</b>    | <b>Gene ID: 103968</b>     |                                 |
| <b>Seq</b>        | FW: CCACCTGGAGGAAAAGATCCC  | RV:<br>GATGGTGCCCTTCAGTTCAGA    |
| <b>RefSeq</b>     | NM_001113471.1             |                                 |
| <b>msCGI58</b>    | <b>Gene ID: 67469</b>      |                                 |
| <b>Seq</b>        | FW: GGTGTCCCACATCTACATCACA | RV: CCATTGGATATGCGCACAGG        |
| <b>RefSeq</b>     | NM_026179.2                |                                 |
